# Supplementary material
Source: publisher figshare collection journal article supplement (https://karger.figshare.com/articles/dataset/_/23143250)
Supplement: Supplementary file 1 [file 1]

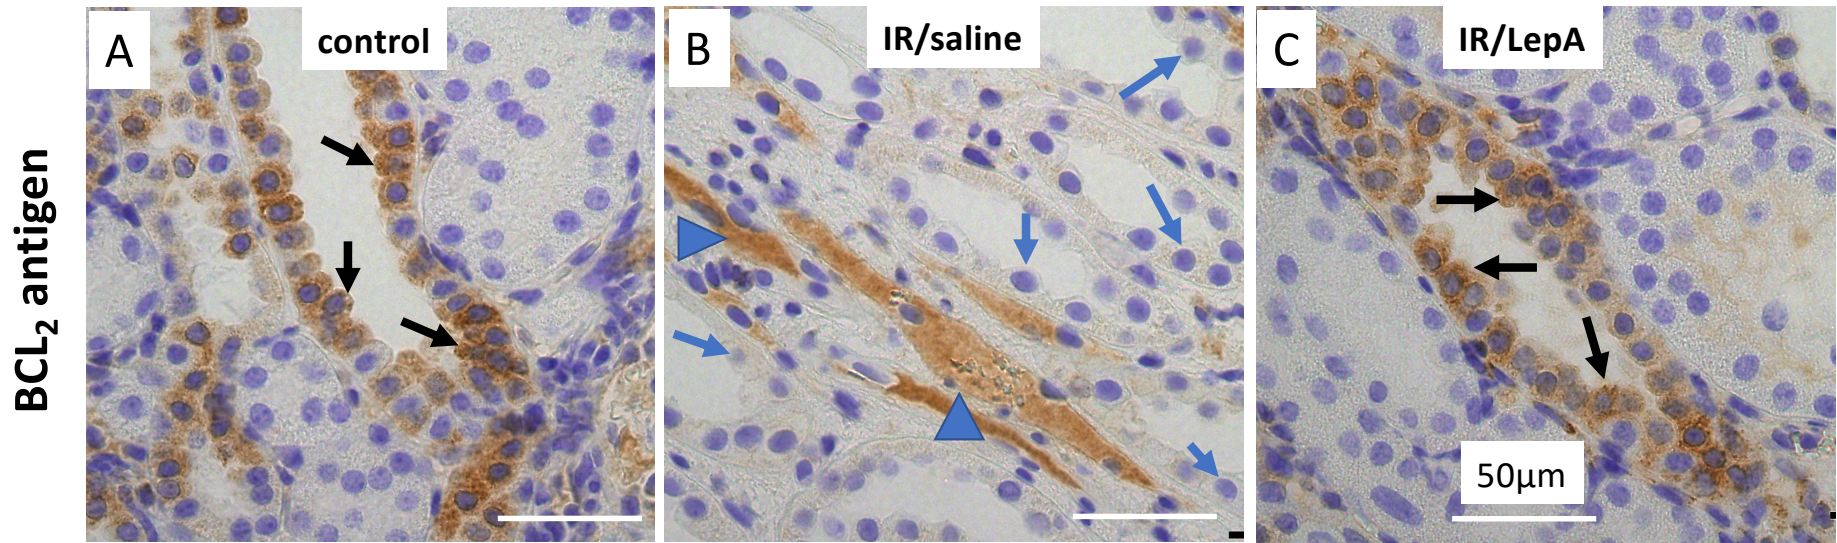

**Suppl. Figure 1: Representative presentation of BCL2 IHC in normal control, IR/LepA and IR/saline treated kidneys.** (A) control, (B) IR/LepA, (C) IR/saline. Note a strong signal of BCL2 antigen in tubular epithelial cells of control and IR/LepA-treated kidney (brown cytoplasmic staining, black arrows) versus a weak signal in IR/saline-treated kidney (blue arrows). Arrowheads (blue) point at positively stained capillary endothelial cells.
